# Supplementary material for: In situ immobilization of YVO4:Eu phosphor particles on a film of vertically oriented Y2(OH)5Cl·nH2O nanosheets
Source: Royal Society of Chemistry journal article supplement (doi:10.1039/d0cc04746e), 2020-01-01
Supplement: d0cc04746e1.pdf [file d0cc04746e1.pdf]

## Electronic Supplementary Information

### **In situ immobilization of YVO<sub>4</sub>:Eu phosphor particles on the film of vertically oriented Y<sub>2</sub>(OH)<sub>5</sub>Cl·*n*H<sub>2</sub>O nanosheets**

*Bora Kang<sup>†</sup>, Hyunsub Kim<sup>†</sup> and Song-Ho Byeon<sup>\*</sup>*

*Department of Applied Chemistry, College of Applied Science and Institute of Natural  
Sciences, Kyung Hee University, Gyeonggi, 17104, Korea*

*E-mail: shbyun@khu.ac.kr*

*Chem. Commun.*

## Experimental details

### *Synthesis of Eu<sup>3+</sup>-Doped Layered Yttrium Hydroxide Films on a Glass Slide Substrate.*

The chemical bath deposition (CBD) method was employed to grow Eu<sup>3+</sup>-doped layered RE hydroxylchloride (Y<sub>1.90</sub>Eu<sub>0.10</sub>(OH)<sub>5</sub>Cl·*n*H<sub>2</sub>O; LYH:Eu) nanosheets perpendicular to the substrate surface. Typically, the chemical bath solution was prepared by completely dissolving 9.5 mmol YCl<sub>3</sub>·6H<sub>2</sub>O (ACROS ORGANICS, 99.9%), 0.5 mmol EuCl<sub>3</sub>·7H<sub>2</sub>O (Sigma Aldrich, 99.9%), and 130 mmol NaCl (Alfa Aesar, 99.0%) in 100 mL deionized water under constant stirring. Hexamethylenetetramine (HMTA, 10 mmol, Sigma Aldrich, 99.0%) was used as a hydroxide source. Prior to the film deposition, the glass slide (2.5 × 7.5 cm<sup>2</sup>) was immersed in acetone and degreased in an ultrasonic bath for 10 min, washed with copious ethanol, and then dried using an air gun. The cleaned glass substrate was tilted at an angle of ~45° in a 125 mL plastic bottle, in which the prepared solution was then slowly poured. The sealed bottle was ultrasonicated for 30 s to remove bubbles on the surface of the substrate. This chemical bath was held at 60 °C for 10 h in an oven. After the film growth was complete, the glass substrate was removed from the bath, washed with deionized water and ethanol successively, and dried with an air gun. The downward side of the substrate was used for all characterizations.

### *Immobilization of YVO<sub>4</sub>:Eu Nanoparticles on the LYH:Eu Film of Nanosheets.*

An aqueous *meta*-vanadate (VO<sub>3</sub><sup>-</sup>) solution (10 mM) was prepared by dissolving the desired amounts of NaVO<sub>3</sub> (Sigma Aldrich, 98%) in distilled water. To immobilize in situ YVO<sub>4</sub>:Eu particles on the edge of vertically oriented LYH:Eu hydroxide nanosheets, the obtained LYH:Eu films were immersed in 50 mL VO<sub>3</sub><sup>-</sup> solutions for 1–5 h at room temperature with constant stirring (400 rpm). The solution pH was adjusted to ~7 and ~9 by drop-wise addition of the KOH solution to evaluate the pH dependence of the reaction rate and the size of the YVO<sub>4</sub>:Eu particles. After the heterostructured YVO<sub>4</sub>:Eu/LYH:Eu film formation was complete, the glass substrate was washed with deionized water and dried with an air gun.

### *Detection and Removal of Cu<sup>2+</sup> Using YVO<sub>4</sub>:Eu/LYH:Eu Films Grown on Glass Substrates.*

A 1.0 M aqueous Cu<sup>2+</sup> stock solution was prepared by dissolving CuCl<sub>2</sub> (Sigma

Aldrich, reagent grade) in deionized water at room temperature and then diluted to make 1.0 mM, 0.5 mM, and 30  $\mu$ M test solutions. The sensitivity of the luminescence quenching of the YVO<sub>4</sub>:Eu/LYH:Eu film to the Cu<sup>2+</sup> concentration was assessed by separately putting a drop of these aqueous CuCl<sub>2</sub> solutions and deionized water on the same YVO<sub>4</sub>:Eu/LYH:Eu film and drying in air. For the adsorption reaction of Cu<sup>2+</sup> cations, the YVO<sub>4</sub>:Eu/LYH:Eu film obtained at a pH of  $\sim$ 7 was dipped into 50 mL of the 30  $\mu$ M aqueous CuCl<sub>2</sub> solution for 30 min at room temperature with constant stirring. The Cu<sup>2+</sup>-adsorbed film was then washed with copious amounts of water and dried with an air gun.

#### ***Desorption of Cu<sup>2+</sup> from YVO<sub>4</sub>:Eu/LYH:Eu Films.***

A 1.0 mM aqueous ethylenediaminetetraacetate (EDTA) solution was prepared by dissolving EDTA disodium salt dehydrate, C<sub>10</sub>H<sub>14</sub>N<sub>2</sub>Na<sub>2</sub>O<sub>8</sub>·2H<sub>2</sub>O (TCI, 99.5%), in deionized water at room temperature. To evaluate the recyclability of the film after desorption of Cu<sup>2+</sup>, the Cu<sup>2+</sup>-adsorbed YVO<sub>4</sub>:Eu/LYH:Eu film was immersed in 50 mL of 1.0 mM EDTA solution for 12 h at room temperature with constant stirring, rinsed with copious amounts of deionized water, and dried using an air gun. This adsorption/desorption reaction cycle was repeated twice to demonstrate the reversible luminescence quenching of the YVO<sub>4</sub>:Eu/LYH:Eu film.

#### ***Characterizations***

X-ray diffraction (XRD) patterns of the LYH:Eu and YVO<sub>4</sub>:Eu/LYH:Eu films were recorded with a Bruker D8 Advance diffractometer using Cu-K $\alpha$  radiation. Field emission scanning electron microscopy (FE-SEM) was carried out with a Carl Zeiss LEO SUPRA 55 scanning electron microscope operating at 30 kV. The excitation and emission spectra were recorded on an FP-6600 spectrophotometer (Jasco Corporation) with a Xenon flash lamp. Quantum yields of the obtained films were determined using an integrating sphere technique.

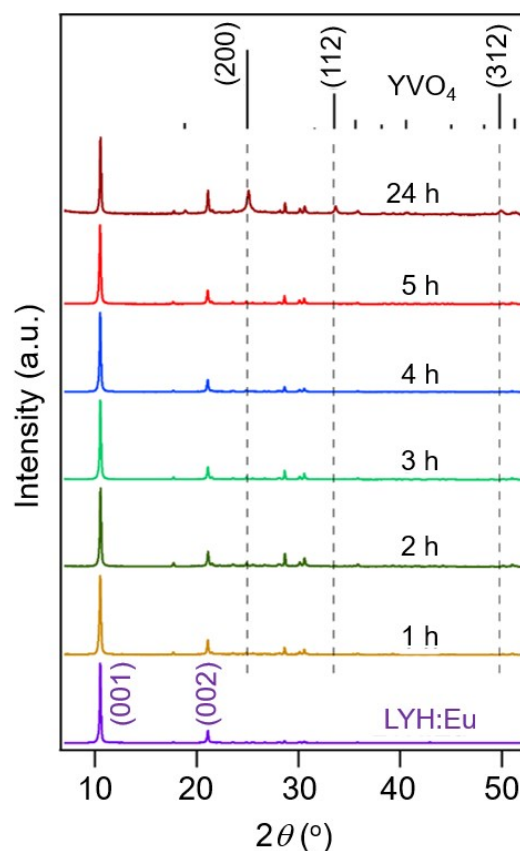

**Fig. S1** X-ray diffraction patterns of the LYH:Eu film before and after reaction in a 10 mM aqueous  $\text{NaVO}_3$  solution at room temperature, as a function of reaction time. Relative diffraction intensities of tetragonal  $\text{YVO}_4$  (JCPDS No.17-0341) are also given for comparison. Based on XRD patterns, the essential formation reaction of  $\text{YVO}_4\text{:Eu}$  in this work is proposed by the equation:  $\text{Y}_{1.90}\text{Eu}_{0.10}(\text{OH})_5\text{Cl}\cdot n\text{H}_2\text{O} + 2\text{VO}_3^- \rightarrow 2\text{Y}_{0.95}\text{Eu}_{0.05}\text{VO}_4 + \text{OH}^- + \text{Cl}^- + (2 + n)\text{H}_2\text{O}$

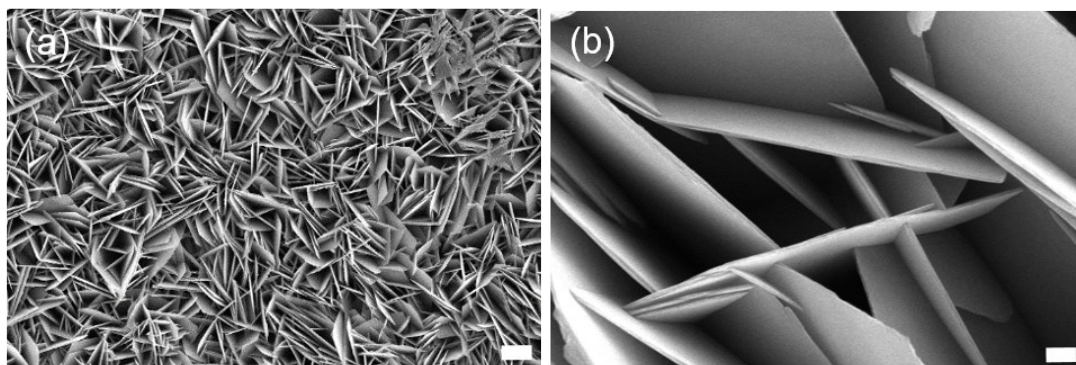

**Fig. S2** SEM images of the as-grown LYH:Eu film. Scale bar = 2  $\mu\text{m}$  (a) and 200 nm (b).

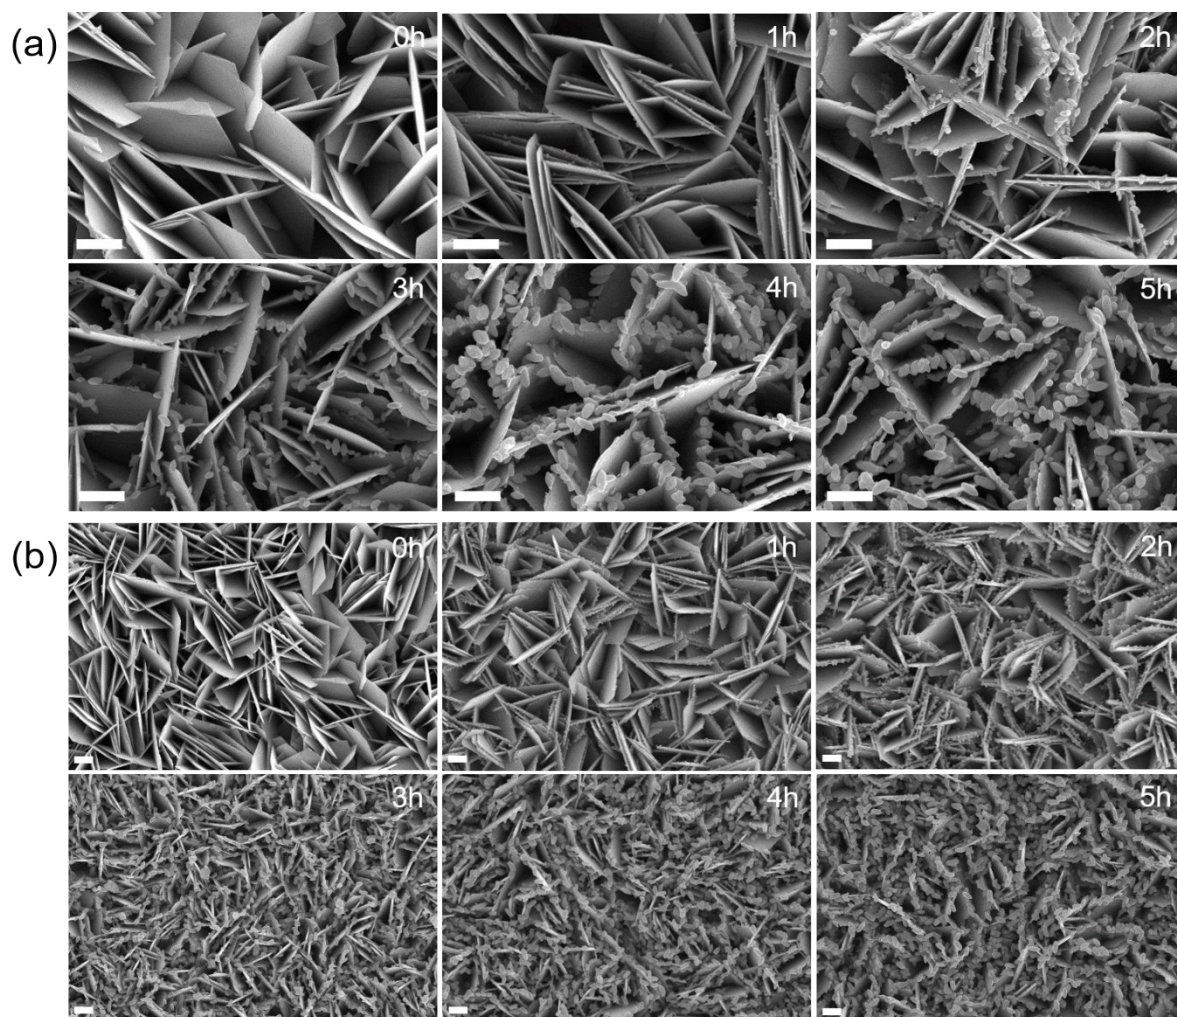

**Fig. S3** (a) SEM images of LYH:Eu film as a function of reaction time in 10 mM aqueous  $\text{NaVO}_3$  solution (scale bar = 1  $\mu\text{m}$ ) at room temperature. (b) Larger area images of corresponding films (scale bar = 1  $\mu\text{m}$ ).



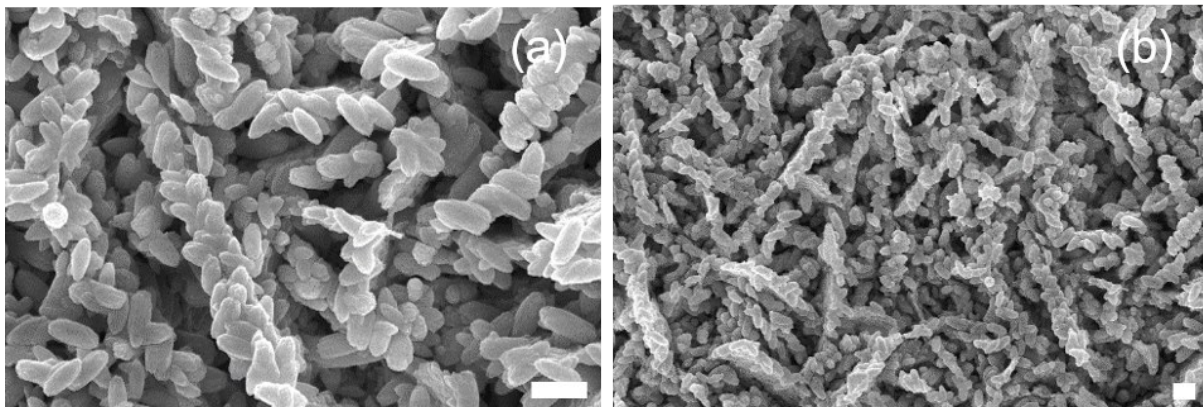

**Fig. S4** (a) Small and (b) large area SEM images of LYH:Eu film after reaction in 10 mM aqueous  $\text{NaVO}_3$  solution for 24 h (scale bar = 1  $\mu\text{m}$ ).

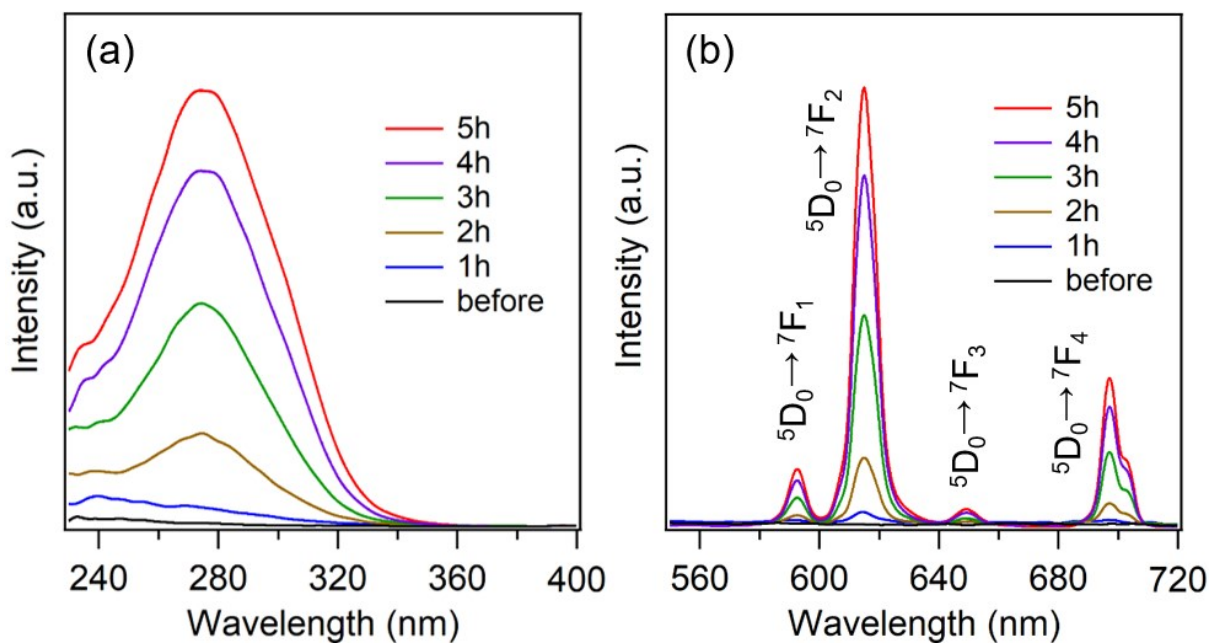

**Fig. S5** (a) Excitation ( $\lambda_{\text{em}} = 615 \text{ nm}$ ) and (b) emission ( $\lambda_{\text{ex}} = 273 \text{ nm}$ ) spectra of LYH:Eu films before and after reaction in 10 mM aqueous  $\text{NaVO}_3$  solution as a function of reaction time at room temperature.

As shown in Fig. S5a, when monitored at 615 nm, practically no absorption band was observed in the excitation spectra of the as-synthesized LYH:Eu film. Even the series of weak peaks generally observed in the 350–400 nm region, which are attributed to the intra-4f electronic transitions of  $\text{Eu}^{3+}$ , were not clearly distinguishable. The reaction of this film in a

NaVO<sub>3</sub> solution induced a significant increase in photoexcitation intensity as a function of reaction time. The highly enhanced, broad excitation band at ~273 nm is ascribed to charge transfer (CT) from the O<sup>2-</sup> ligands to the central vanadium atom within the VO<sub>4</sub><sup>3-</sup> group ions, indicating energy transfer from the CT band to the excited states of Eu<sup>3+</sup> ions in the YVO<sub>4</sub> matrix.<sup>S1</sup> The emission spectra measured at an excitation wavelength of 273 nm showed the characteristic <sup>5</sup>D<sub>0</sub> → <sup>7</sup>F<sub>J</sub> (J = 0–4) transitions of Eu<sup>3+</sup>, with the dominant <sup>5</sup>D<sub>0</sub> → <sup>7</sup>F<sub>2</sub> transition around 615 nm leading to the bright red emission of the YVO<sub>4</sub>:Eu/LYH:Eu films (Fig. S5b). The strong increase in emission intensity, which was essentially the consequence of efficient energy transfer, was evidently caused by significant formation of YVO<sub>4</sub>:Eu phosphor. Such a variation in the PL spectra of the LYH:Eu film was consistent with those observed in XRD patterns and SEM images, confirming the triggering of the conversion to YVO<sub>4</sub>:Eu phosphor particles at its surface after 2 h reaction and the subsequent increase in size and number density of particles with increasing reaction time.

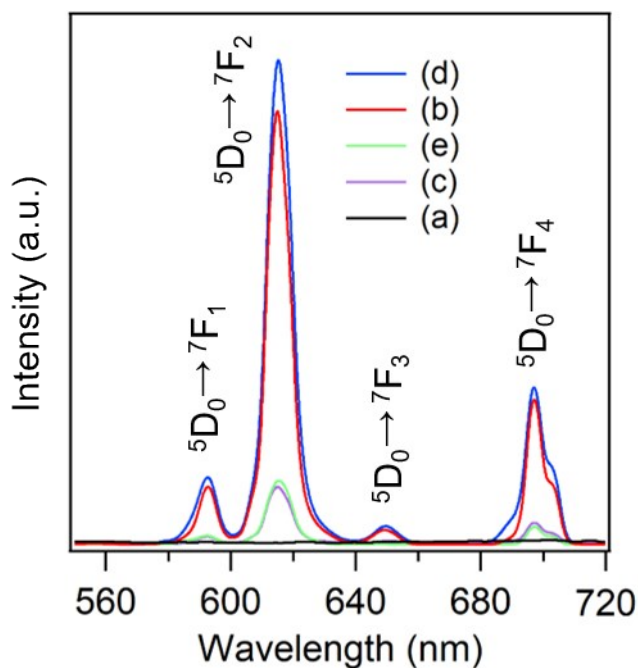

**Fig. S6** Emission spectra under a 312 nm UV lamp of (a) the as-prepared LYH:Eu film, YVO<sub>4</sub>:Eu-immobilized LYH:Eu film (b) before and (c) after the first reaction in 30  $\mu$ M aqueous Cu<sup>2+</sup> solution for 30 min. YVO<sub>4</sub>:Eu-immobilized LYH:Eu film (d) after regeneration in 1.0 mM EDTA solution for 12 h and (e) after the second adsorption reaction in 30  $\mu$ M aqueous Cu<sup>2+</sup> solution for 30 min.

## References

S1. K. Riwotzki and M. Haase, *J. Phys. Chem. B.*, 1998, **102**, 10129.
